# Supplementary material for: Programmed Catalytic Therapy-Mediated ROS Generation and T-Cell Infiltration in Lung Metastasis by a Dual Metal-Organic Framework (MOF) Nanoagent
Source: MDPI journal article supplement (doi:10.3390/pharmaceutics14030527), 2022-02-27
Supplement: s1 [file s1]

# Supplementary Materials: Programmed Catalytic Therapy-Mediated ROS Generation and T-Cell Infiltration in Lung Metastasis by Dual Metal Organic Framework (MOF) Nanoagents

Bhanu Nirosha Yalamandala, Pin-Hua Chen, Thrinayan Moorthy, Thi My Hue Huynh, Wen-Hsuan Chiang and Shang-Hsiu Hu

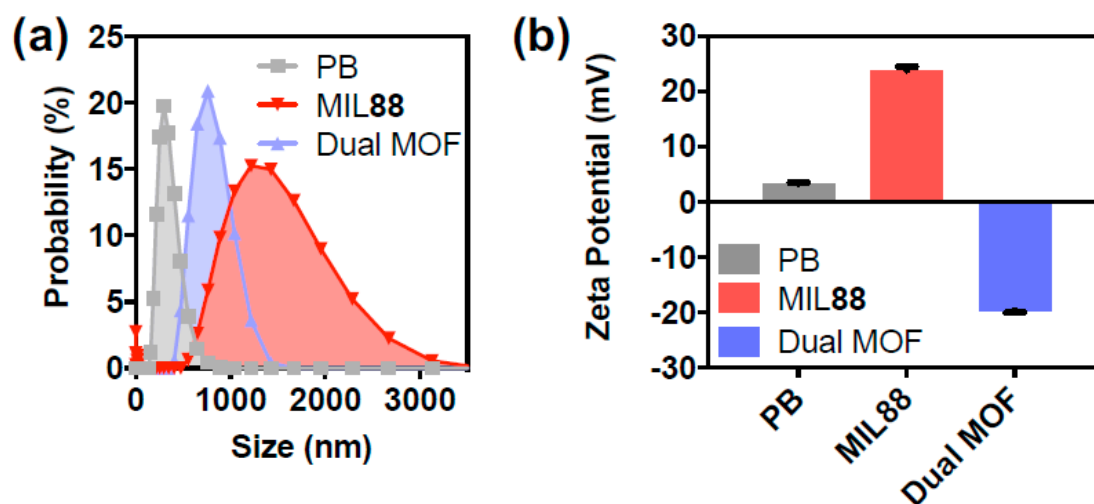

Figure S1. Colloidal stability of PB, MIL88 and dual MOF in DMEM + 10% FBS over 24 h.

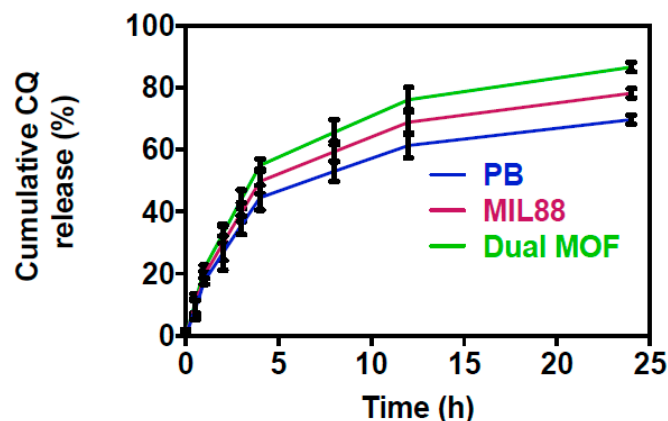

Figure S2. CQ release patterns of PB, MIL88 and dual MOF.

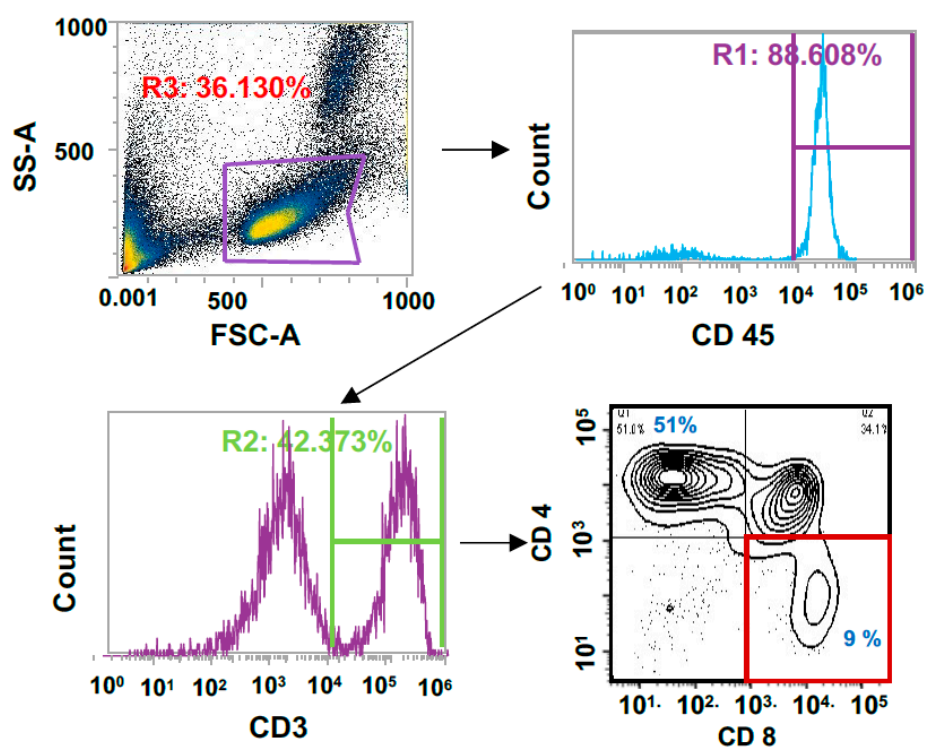

Figure S3. The gating strategy of T cells in flow cytometry.

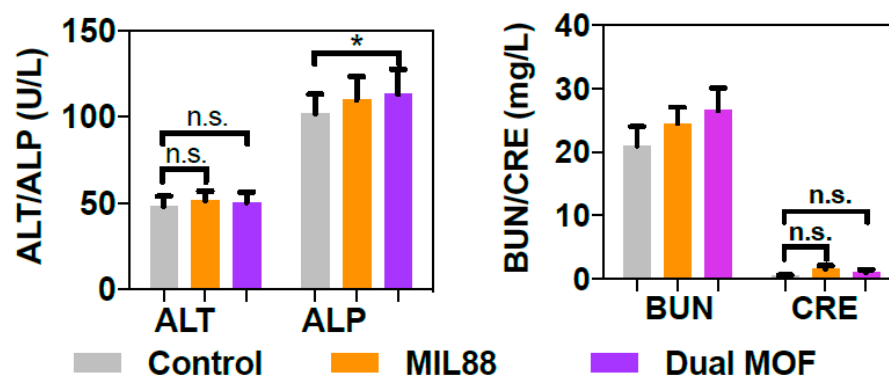

Figure S4. Liver function (ALT and ALP) and kidney function (BUN and CRE) at 48 h postinjection of PBS, MIL88 and dual MOF ( $n = 5$ ).
